# Supplementary material for: Inter-Cellular Transport of Ran GTPase
Source: PubMed Central journal article supplement (PMC4403925; doi:10.1371/journal.pone.0125506), 2015-04-20
Supplement: pone.0125506.s002.pdf [file pone.0125506.s002.pdf]

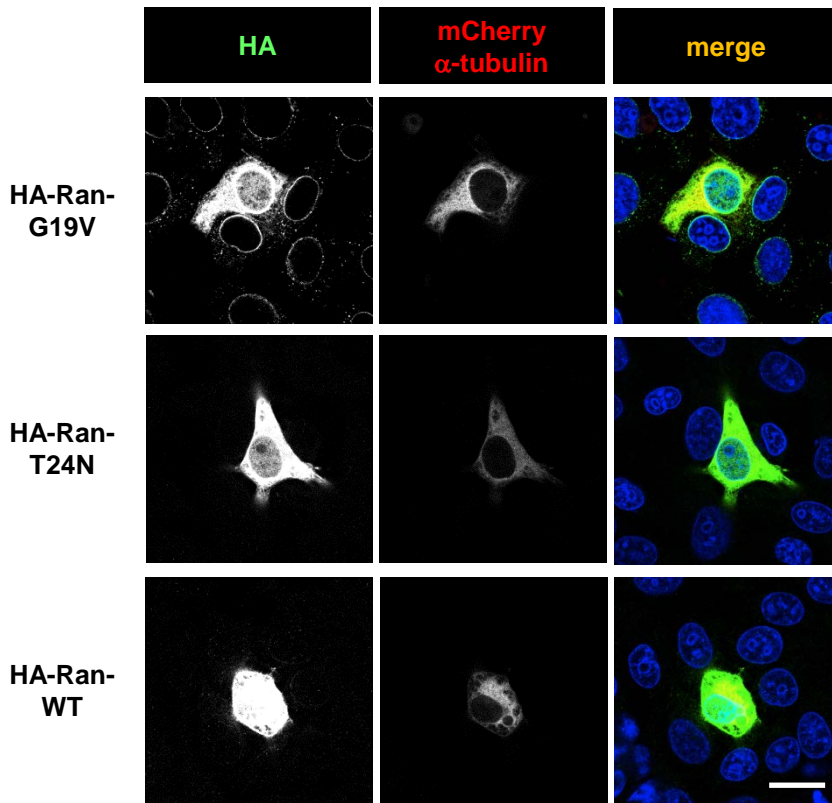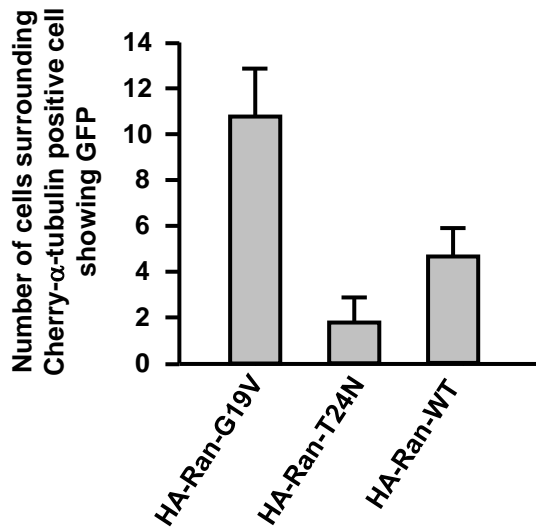

**S2 Fig. Distribution of ectopically expressed HA-tagged version of Ran GTPase.** *Upper panel*, HeLa cells were co-transfected with HA-Ran- G19V, HA-Ran-T24N or HA-Ran-WT and mCherry- $\alpha$ -tubulin as transfection marker. Nine hours later cells were fixed with methanol and stained for HA using specific antibodies (green). mCherry- $\alpha$ -tubulin (red) was detected by epifluorescence. DNA was visualized by Hoechst 33342 staining (blue). Scale bar, 20  $\mu$ m. *Lower panel*, Quantitative data showing the number of recipient cells displaying GFP staining surrounding the mCherry- $\alpha$ -tubulin positive donor cell. Cells were counted from 30 individual fields randomly across three independent experiments. Data are expressed as mean  $\pm$  SD.
