# Supplementary material for: Inter-Cellular Transport of Ran GTPase
Source: PubMed Central journal article supplement (PMC4403925; doi:10.1371/journal.pone.0125506), 2015-04-20
Supplement: pone.0125506.s003.pdf [file pone.0125506.s003.pdf]

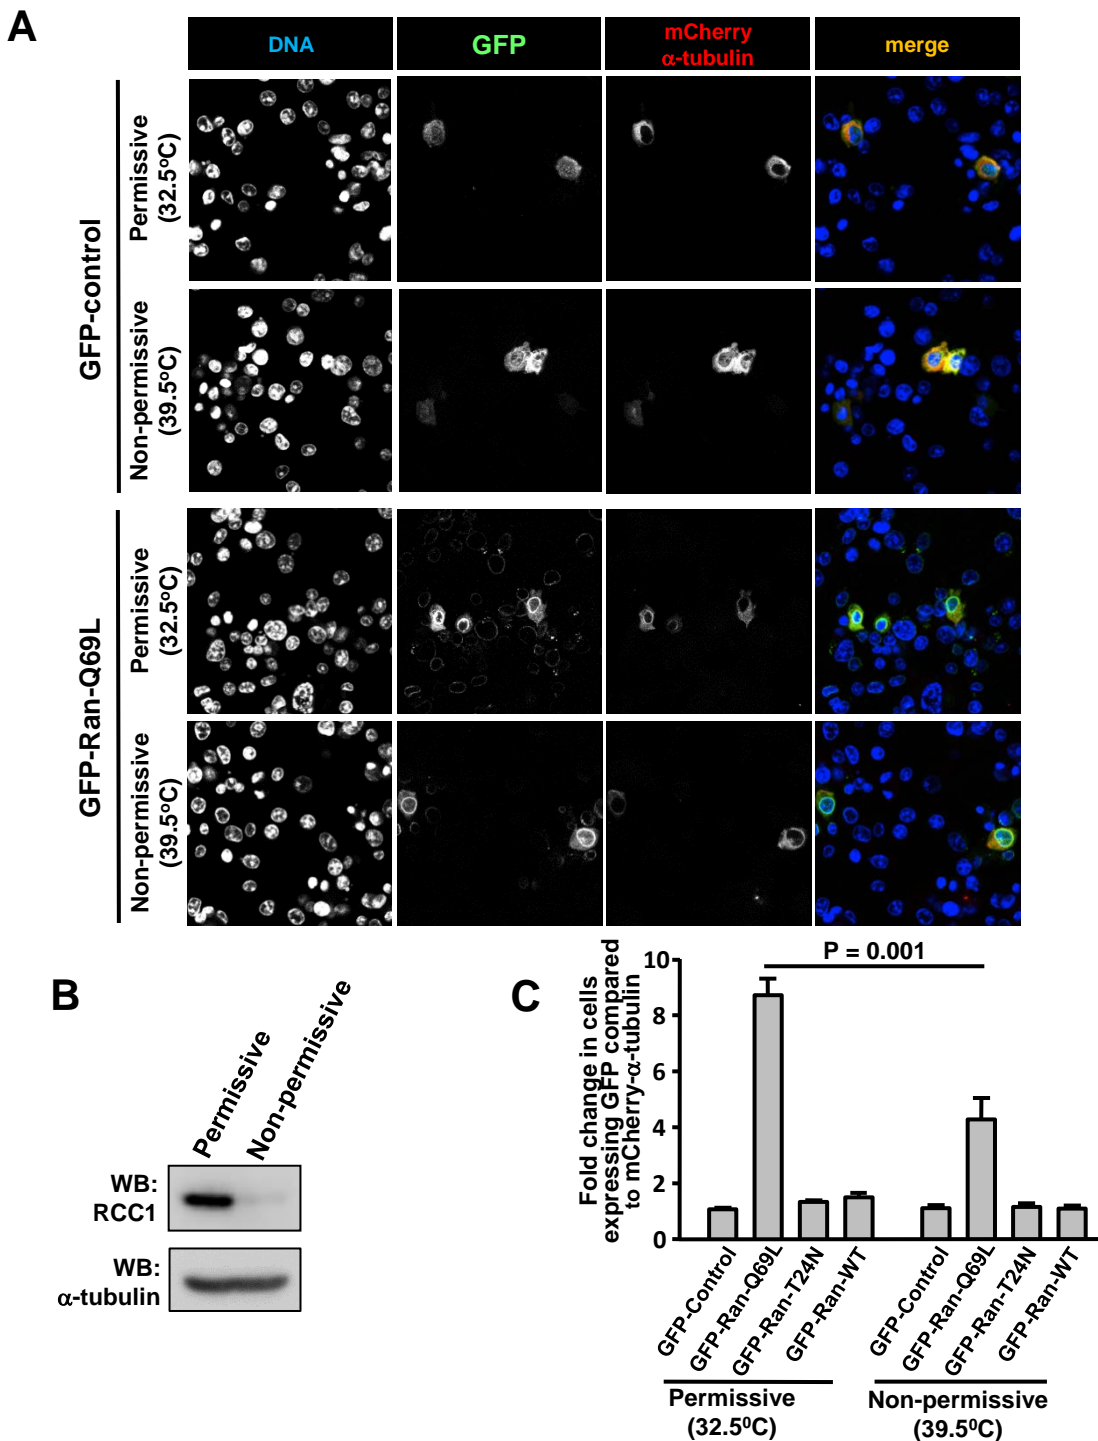

**S3 Fig. Effect of RCC1 depletion on Ran transfer.** (A) tsBN2 cells were grown at permissive temperature (32.5°C) and were transfected with indicated plasmids for 3 h. Cells were continued in permissive temperature or shifted to non-permissive temperature (39.5°C). Eight hours later cells were fixed with methanol and stained for GFP using specific antibodies (green). mCherry- $\alpha$ -tubulin (red) was detected by epifluorescence. DNA was visualized by Hoechst 33342 staining (blue). (B) tsBN2 cells were grown at permissive temperature or non-permissive temperature for 3 h and the level of RCC1 was monitored by western blotting.  $\alpha$ -tubulin was used as loading control. (C) Quantitative data showing fold change in cells expressing GFP over mCherry- $\alpha$ -tubulin. Cells were counted from 30 individual fields randomly across three independent experiments. Data are expressed as mean  $\pm$  SD.
