# Supplementary material for: Inter-Cellular Transport of Ran GTPase
Source: PubMed Central journal article supplement (PMC4403925; doi:10.1371/journal.pone.0125506), 2015-04-20
Supplement: pone.0125506.s004.pdf [file pone.0125506.s004.pdf]

**A**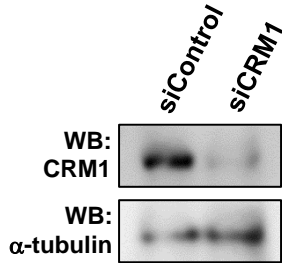**B**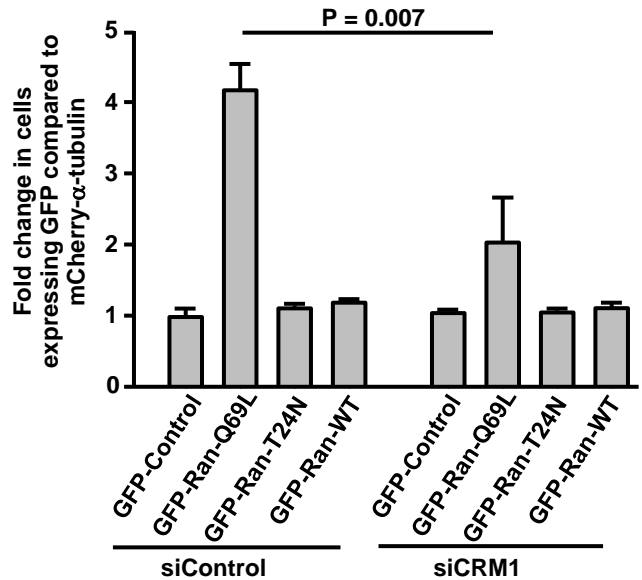

**S4 Fig. Effect of CRM1 depletion on Ran transfer.** (A) HeLa cells were transfected with control (siControl) or CRM1 specific (siCRM1) siRNA for 60 h. The cell lysates were analyzed for the level of CRM1 by western blotting.  $\alpha$ -tubulin was used as loading control. (B) HeLa cells were transfected with control or CRM1-specific siRNA for 36 h and then co-transfected with indicated GFP and mCherry- $\alpha$ -tubulin constructs. Twenty four hours later, cells were fixed with methanol and stained for GFP using specific antibodies. mCherry- $\alpha$ -tubulin was detected by epifluorescence. Fold change in cells expressing GFP over mCherry- $\alpha$ -tubulin was determined. Cells were counted from 30 individual fields randomly across three independent experiments. Data are expressed as mean  $\pm$  SD.
